# Supplementary material
Source: Elsevier journal article supplement (https://www.sciencedirect.com/science/article/pii/S2173578620300020)
Supplement: mmc1 [file S2173578620300020:mmc1.docx]

**Anexo 1. Cuestionario de satisfacción tras LEOC (SATISLIT)**

1.¿Cómo calificaría la efectividad del tratamiento mediante litotricia?

0 1 2 3 4 5 6 7 8 9 10

2.¿Durante cuántos días precisó tomar analgésicos tras el procedimiento?

1 día Menos de 1 semana 1-2 semanas 3-4 semanas Más de 1 mes

3.¿Cuánto tiempo tardó en reanudar sus actividades diarias después del tratamiento?

1 día Menos de 1 semana 1-2 semanas 3-4 semanas Más de 1 mes

4.¿Cómo ha alterado su calidad de vida recibir tratamiento mediante litotricia?

Nada Poco Bastante Mucho Totalmente
